# Rapid HLA-DQB1 Genotyping for Four Alleles in the Assessment of Risk for IDDM in the Finnish Population

JORMA ILONEN, MD  
HELENA REIJONEN, PHD  
ELJA HERVA, MD  
MINNA SJÖROOS, MSC  
ANTTI IITIÄ, PHD

TIMO LÖVGREN, PHD  
RIITTA VEIJOLA, MD  
MIKAEL KNIP, MD  
HANS K. ÅKERBLOM, MD  
THE CHILDHOOD DIABETES IN FINLAND  
(DiMe) STUDY GROUP

**OBJECTIVE** — To study the effectiveness of MHC genotyping in the assessment of risk for IDDM based on the identification of alleles that are significantly associated with risk for IDDM (DQB1\*0302 and \*0201) and protection from it (DQB1\*0602/\*0603 and \*0301).

**RESEARCH DESIGN AND METHODS** — A long series of 649 index cases of IDDM, together with their healthy siblings and 756 healthy blood donors, was collected in Finland. The samples were analyzed using a large-scale assay procedure that was developed for rapid screening purposes. The method utilizes time-resolved fluorometry to detect the hybridization of lanthanide-labeled allele-specific oligonucleotide probes with amplified gene product.

**RESULTS** — A total of 61.9% of IDDM index cases had high risk (DQB1\*0201/\*0302) or moderate risk (DQB1\*0302/x [x meaning DQB1\*0302 or a nondefined allele]) genotypes compared with 14.3% of the reference population. In patients and control subjects, the frequencies of low risk genotypes were 28.0 and 22.1%, respectively, and those of decreased risk genotypes, 10.0 and 63.6%. The relative risk of a \*0201/\*0302 genotype was 53.5 (31.1–92.8) compared with the decreased risk genotypes (63.6% of controls). The graded risk estimation was equally efficient in assessing the risk of IDDM in siblings of child with IDDM.

**CONCLUSION** — The near-automatic typing procedure developed is attractive for large-scale screening projects, such as diabetes prevention and intervention trials.

IDDM is a polygenic autoimmune disease. The most important genes that influence human susceptibility to IDDM are located within the major histocompatibility complex (MHC), the HLA region on the short arm of the human sixth chromosome. The exact number of HLA gene loci that affect an individual's susceptibility to IDDM, as well as their localization, is still unknown, but the HLA-DQ locus contains the strongest known risk markers and protective alleles, probably reflecting the relevance of HLA-DQ's role in the pathogenesis of IDDM (1).

The prediction of individual genetic risk is of considerable interest, particularly with respect to diabetes prevention and intervention trials and in research projects that aim at the identification of environmental factors triggering or enhancing  $\beta$ -cell damage (2,3). In the growing number of intervention trials, subjects with high risk are recruited to undergo experimental therapies or diets (4).

We have previously suggested a simple risk-grading system based on the definition of genotypes that encode either

high or intermediate risk or that show protection (genotypes that are very rare in patients) (5). Here, we wanted to test the practicality and effectiveness of this strategy in large cohorts of patients and controls. Toward this end, we developed a rapid, nearly automated typing system (6). The data obtained confirm and extend our risk-grading strategy, and they demonstrate the utility of this new genotyping procedure.

## RESEARCH DESIGN AND METHODS

Blood samples from subjects with IDDM and from their family members were collected in the Childhood Diabetes in Finland (DiMe) study (7). The study included 801 families of children <15 years of age who were diagnosed with IDDM between September 1986 and April 1989. These families represent the vast majority of all new IDDM cases presented in Finland during this period. Signs of an acute infection were registered at diagnosis, and a blood sample was taken for the measurement of blood glucose, capillary blood gases, HbA<sub>1c</sub> or HbA<sub>1c</sub>, and serum C-peptide concentrations before the initiation of insulin treatment.

The collection of venous blood samples for DNA extraction was added to the study protocol later, but samples from 697 families were obtained. PCR-based HLA-DQB1 typing was successfully carried out in 649 IDDM index cases and in 662 siblings, 56 of whom were diagnosed to have IDDM before or after the DiMe study index case. A total of 756 DNA samples from healthy blood donors from different parts of the country (Helsinki, Joensuu, Kuopio, Rovaniemi, Turku, and Vaasa) were analyzed in parallel.

The HLA-DQB1 typing method has been described in detail previously (6). In brief, 158 bp of the second exon of the DQB1 gene from each DNA sample were amplified by the polymerase chain reaction (PCR) using a primer pair with a biotinylated 3' primer. The amplification product was bound to streptavidin-coated microtitration plates and dena-

From the Turku Immunology Center and Department of Virology (J.I., H.R., M.S.), University of Turku, Turku; the National Public Health Institute (E.H.), Oulu; the Department of Biotechnology (A.I., T.L.), University of Turku, Turku; the Department of Pediatrics (R.V., M.K.), University of Oulu, Oulu; and the Second Department of Pediatrics (H.K.Å.), Children's Hospital, University of Helsinki, Helsinki, Finland.

Address correspondence and reprint requests to Jorma Ilonen, MD, Department of Virology, University of Turku, Kiinamyllynkatu 13, FIN-20520 Turku, Finland. E-mail: jorma.ilonen@utu.fi.

Received for publication 26 May 1995 and accepted in revised form 7 March 1996.

DiMe, Diabetes in Finland; MHC, major histocompatibility complex; PCR, polymerase chain reaction; RR, relative risk.

Table 1—The frequencies of IDDM patients (DiMe probands) and control subjects positive for studied HLA-DQB1 alleles

| DQB1* allele | IDDM patients | Control subjects | P       | RR (95% CI)       |
|--------------|---------------|------------------|---------|-------------------|
| 0201         | 281 (43.3)    | 179 (23.7)       | <0.0001 | 2.46 (1.95–3.11)  |
| 0301         | 89 (13.7)     | 161 (21.3)       | 0.0003  | 0.59 (0.44–0.79)  |
| 0302         | 468 (72.3)    | 168 (22.2)       | <0.0001 | 9.04 (7.04–11.62) |
| 0602–0603    | 44 (6.8)      | 321 (42.5)       | <0.0001 | 0.10 (0.07–0.14)  |
| Totals       | 649           | 756              |         |                   |

Data are n (%).

tured with NaOH. After washing, bound DNA was analyzed using two different hybridization mixtures: one containing a europium (Eu)-labeled internal reporter probe for DQB1\*0602 and \*0603 alleles (\*0602–\*0603) plus a terbium (Tb)-labeled consensus probe. The second hybridization mixture included Tb-, samarium (Sm)-, and Eu-labeled probes specific for DQB1\*0201, \*0301, and \*0302 alleles, respectively. For measurement of probe hybridization, microtitration plates were analyzed by time-resolved fluorescence (Delfia Research Fluorometer, Wallac Oy, Turku, Finland). The different emission wavelengths and delay times were used to distinguish the signals of each lanthanide label.

In five probands and one control subject, it was apparent that three alleles were detected. All of these samples were positive for both \*0301 and \*0302, simultaneously. This may reflect the presence of a DQB1\*0304 allele recognized by both DQB1\*0301- and \*0302-specific probes. These cases were not included in our analyses.

We used a  $\chi^2$  test with continuity correction for our statistical analysis. Estimates of relative risk (RR) or odds ratios were calculated according to the formula  $(a \times d)/(b \times c)$ , in which  $a$  and  $b$  are the numbers of patients who were positive and negative for the marker, respectively, and  $c$  and  $d$ , the respective numbers for control subjects.

Blood glucose concentrations and capillary blood gases were measured using routine laboratory methods. Diabetic ketoacidosis at diagnosis was defined as a capillary blood pH of <7.30. The various hospitals participating in the study used standard methods to determine HbA<sub>1c</sub> or HbA<sub>1c</sub> results. To make the glycosylated hemoglobin results comparable, they were expressed as a standard deviation

(SD) based on the reference range in non-diabetic subjects at each hospital. Serum C-peptide concentrations were analyzed radioimmunologically with antiserum K6 using commercial reagents (Novo Research, Bagsvaerd, Denmark). The detection limit was 0.02 nmol/l.

**RESULTS**— The frequencies of the four defined DQB1 alleles in IDDM index cases and control subjects are shown in Table 1. The earlier observations (5) of alleles associated with strong (DQB1\*0302) and weak (DQB1\*0201) susceptibility to disease as well as strong (DQB1\*0602–\*0603) and weak (DQB1\*0301) protection were confirmed.

The distribution of genotypes defined by the detection of these alleles is shown in Table 2. A different strength for each allele in risk and protection can be seen. The highest risk was associated with heterozygosity for DQB1\*0201 and \*0302, but an increased risk was also detected with DQB1\*0302 alone, provided

the absence of protective alleles. The allele associated with a strongly decreased risk, DQB1\*0602–\*0603, is still protective in a genotype with the weak risk marker DQB1\*0201 (RR = 0.13 for DQB1\*0201/\*0602–\*0603), whereas the combination of \*0602–\*0603 with the strong susceptibility allele, DQB1\*0302, codes equivocal risk (RR = 0.87 for DQB1\*0302/\*0602–\*0603). In contrast, the protection mediated by the DQB1\*0301 allele appeared to be passive in effect, since both DQB1\*0301/\*0302 and DQB1\*0201/\*0301 genotypes fell, like the DQB1\*0201/x genotype, into the group of equivocal risk genotypes. Similar patterns were detected in the comparison of the IDDM index cases and their unaffected siblings (Table 3). However, risk ratios were lower because of the enrichment of risk alleles within families.

When the genotypes in children with IDDM were analyzed separately, the DQB1\*0201/x genotype was found more often in boys than in girls. A total of 56 male index cases (15.6%) had this genotype compared with 28 female index cases (9.7%;  $P = 0.034$ ). The proportion of patients with the DQB1\*0201/x genotype was especially low among those diagnosed from April to June. The difference was significant ( $P = 0.025$ ) when these 3 months were compared with others, but the heterogeneity of the whole distribution did not reach statistical significance.

A simplified risk-grading scheme with four categories was created by combining genotypes that had decreased among IDDM patients (DQB1\*0602–

Table 2—Defined HLA-DQB1 genotypes in IDDM patients (DiMe index cases) and control subjects

| DQB1* genotype | IDDM patients | Control subjects | P       | RR (95% CI)       |
|----------------|---------------|------------------|---------|-------------------|
| 0201/0302      | 159 (24.5)    | 22 (2.9)         | <0.0001 | 10.8 (6.70–17.65) |
| 0302/x         | 243 (37.4)    | 86 (11.4)        | <0.0001 | 4.66 (3.51–6.20)  |
| 0301/0302      | 36 (5.5)      | 20 (2.6)         | 0.0084  | 2.16 (1.20–3.92)  |
| 0201/0301      | 33 (5.1)      | 23 (3.0)         | NS      | 1.71 (0.96–3.04)  |
| 0201/x         | 83 (12.8)     | 84 (11.1)        | NS      | 1.17 (0.84–1.64)  |
| 0302/0602–0603 | 30 (4.6)      | 40 (5.3)         | NS      | 0.87 (0.52–1.47)  |
| x/x            | 34 (5.2)      | 124 (16.4)       | <0.0001 | 0.28 (0.19–0.43)  |
| 0301/x         | 17 (2.6)      | 76 (10.1)        | <0.0001 | 0.24 (0.14–0.42)  |
| 0201/0602–0603 | 6 (0.9)       | 50 (6.6)         | <0.0001 | 0.13 (0.05–0.32)  |
| 0301/0602–0603 | 4 (0.6)       | 42 (5.6)         | <0.0001 | 0.11 (0.04–0.31)  |
| 0602–0603/x    | 4 (0.6)       | 189 (25.0)       | <0.0001 | 0.02 (0.01–0.05)  |
| Total          | 649           | 756              |         |                   |

Data are n (%).

Table 3—Defined HLA-DQB1 genotypes in IDDM patients (DiMe index cases) and unaffected siblings

| DQB1*<br>genotype | IDDM<br>patients | Unaffected<br>siblings | P       | RR (95% CI)      |
|-------------------|------------------|------------------------|---------|------------------|
| 0201/0302         | 159 (24.5)       | 51 (8.4)               | <0.0001 | 3.53 (2.49–5.02) |
| 0302/x            | 243 (37.4)       | 135 (22.2)             | <0.0001 | 2.09 (1.62–2.68) |
| 0301/0302         | 36 (5.5)         | 34 (5.6)               | NS      | 0.99 (0.59–1.64) |
| 0201/0301         | 33 (5.1)         | 24 (4.0)               | NS      | 1.30 (0.74–2.30) |
| 0201/x            | 84 (12.9)        | 77 (12.7)              | NS      | 1.01 (0.71–1.42) |
| 0302/0602–0603    | 30 (4.6)         | 41 (6.8)               | NS      | 0.67 (0.40–1.11) |
| x/x               | 34 (5.2)         | 79 (13.0)              | <0.0001 | 0.37 (0.24–0.57) |
| 0301/x            | 18 (2.8)         | 45 (7.4)               | <0.0003 | 0.36 (0.20–0.64) |
| 0201/0602–0603    | 6 (0.9)          | 28 (4.6)               | 0.0001  | 0.19 (0.07–0.49) |
| 0301/0602–0603    | 4 (0.6)          | 20 (3.3)               | 0.0011  | 0.18 (0.07–0.57) |
| 0602–0603/x       | 5 (0.8)          | 72 (11.9)              | <0.0001 | 0.06 (0.02–0.15) |
| Totals            | 649              | 607                    |         |                  |

Data are n (%).

\*0603/x, DQB1\*0301/\*0602–\*0603, DQB1\*0201/\*0602–\*0603, DQB1\*0301/x, and DQB1x/x), as well as those with equivalent or low risk (DQB1\*0301/\*0302, DQB1\*0201/\*0301, DQB1\*0201/x, and DQB1\*0302/\*0602–\*0603). The genotypes DQB1\*0302/x and DQB1\*0201/\*0302 were included in the categories with moderate and high risk. A comparison of IDDM patients and control subjects is shown in Table 4. This classification was used in further analyses.

The 65 index cases who presented with IDDM despite HLA-DQB1 genotypes conferring a decreased risk were characterized by an increased frequency of infections (26.2 vs. 14.8% in the other cases;  $P = 0.034$ ) and ketoacidosis at diagnosis (34.5 vs. 20.2%;  $P = 0.02$ ), while there was no significant difference in age ( $8.0 \pm 4.0$  vs.  $8.5 \pm 3.8$  years) between the two groups. In addition, the former group had higher blood glucose concentrations (median 22.4 vs. 20.0 mmol/l;  $P = 0.05$ ) and GHb levels ( $14.7 \pm 7.0$  vs.  $12.7 \pm 5.9\%$ ;  $P = 0.03$ ) at diagnosis. The serum C-peptide concentrations were similar in both groups at clinical presentation (median 0.17 vs. 0.16 nmol/l).

A high genetic risk was associated with an early age at diagnosis. A total of 51 of 147 (34.7%) index cases that were diagnosed before 5 years of age had a DQB1\*0201/\*0302 genotype, compared with 108 of 502 (21.5%) cases that were diagnosed later in life ( $P = 0.0016$ ). Siblings of DiMe index cases who had been diagnosed with IDDM before or after their index cases had genotypes associated

with higher risk more often than did index cases from single-case families (Table 5). The frequency of the high-risk genotype was 37.5% in these siblings compared to 24.0% in the simplex cases ( $P = 0.036$ ). The genotype frequencies in index cases of multiplex families, however, did not differ significantly from either simplex cases or diabetic siblings.

The genotype effect in second cases in multiplex families, as well as the effect of the genotype of the proband in the family on the risk in initially healthy children, is shown in Table 6. A total of 56 second cases were recorded among 606 genotyped children. A graded genotype-dependent risk was clearly seen in second cases: 29.4% of children with the high risk genotype became diabetic, compared with only 1.3% of those with a decreased risk ( $P < 0.0001$ ). A similar gradient was seen within each family group according to the genotype of the first IDDM case. Second affected cases were more common in families in which the proband had either a high- or moderate-risk genotype

(together 45/374, 12.0%) than in those in which the proband had a low- or decreased-risk genotype (11/219, 5.0%;  $P = 0.0076$ ).

**CONCLUSIONS** — Our results demonstrate that the genotyping of only four alleles of the HLA-DQB1 locus can be used in the efficient grading of disease risk and the screening for susceptibility to IDDM in the Finnish population. The observations from the second affected cases confirm the applicability of the risk gradation in families with more than one diabetic child. Siblings of probands who did not have high- or moderate-risk genotypes also had a lower risk of developing IDDM, consistent with the lower frequency of DQB1 susceptibility genes in these families. If DQ genes were only in linkage disequilibrium with strong susceptibility genes, one would expect to see a similar frequency of secondary IDDM cases in all families. The development of IDDM in cases with low-risk genotypes might have accumulated the effects of minor susceptibility genes, rare environmental factors, or random elements that are associated with the development of immune system (8).

The significance of some key amino acids in the HLA-DQ heterodimer, such as aspartic acid at position 57 (Asp57) in the  $\beta$ -chain and arginine at position 52 in the  $\alpha$ -chain (Arg52), has been strongly emphasized (9–11). The contribution of these specific amino acid positions, however, may be due to the fact that risk-associated heterodimers (DQA1\*0301–DQB1\*0302 and DQA1\*0501–DQB1\*0201) are positive for Arg52 and negative for Asp57, whereas the protective DQA1\*0102–DQB1\*0602 molecule is Arg52 negative and Asp57 positive (1).

In practice, the definition of key amino acids can be laborious, since different alleles can code for specific residues

Table 4—The various risk genotypes found among IDDM index cases and control subjects

| DQB1*<br>genotype | IDDM<br>patients | Control<br>subjects | RR*   | RR† (95% CI)     |
|-------------------|------------------|---------------------|-------|------------------|
| High risk         | 159 (24.5)       | 22 (2.9)            | 10.8  | 53.5 (31.1–92.8) |
| Moderate risk     | 243 (37.4)       | 86 (11.4)           | 4.66  | 20.9 (14.4–30.4) |
| Low risk          | 182 (28.0)       | 167 (22.1)          | 1.37  | 8.1 (5.7–11.4)   |
| Decreased risk    | 65 (10.0)        | 481 (63.6)          | 0.064 | 1.0              |
| Totals            | 649              | 756                 |       |                  |

Data are n (%). \*RR calculated against all others. †RR calculated against those with a decreased risk.

Table 5—HLA-DQB1 risk genotypes in index cases of simplex and multiplex families and in siblings with IDDM who were diagnosed before or after the index case

| DQB1* genotype | Single case probands | Sibpair probands | IDDM siblings |
|----------------|----------------------|------------------|---------------|
| High risk      | 143 (24.0)           | 16 (31.3)        | 21 (37.5)*    |
| Moderate risk  | 223 (37.1)           | 20 (41.7)        | 22 (39.3)     |
| Low risk       | 173 (28.8)           | 9 (18.8)         | 10 (18.2)     |
| Decreased risk | 61 (10.1)            | 4 (8.3)          | 3 (5.5)       |
| Totals         | 600                  | 49               | 56            |

Data are n (%). \*P < 0.036 compared to single case probands.

and since there are several alternatives for a non-Asp residue. Non-Asp57 homozygosity is a rather sensitive marker for IDDM susceptibility: 73% of white patients in the 11th international HLA workshop were homozygous, but 26% of the control subjects also had this genotype, demonstrating the poor specificity of this marker (12). Similar data have also been presented in smaller series in which 18–47% of the control subjects were homozygous for non-Asp57, having a sensitivity of 61–89% (5,13–21).

In the 11th HLA workshop series, the combination of subjects with genotypes that are able to code for four or two possible susceptibility molecules would detect 82% of patients but also 27% of control subjects (12). The corresponding numbers in a large Belgian study were 84 and 27% (18). The specificity of the assay increases if a distinction is made between the genotypes encoding two susceptibility heterodimers, those with SS,SS,SP,SP and SS,SS,PS,PS genotypes. The first letter in each molecule indicates the risk conferred by an  $\alpha$ -chain and the latter  $\beta$ -chain mediated risk (S, susceptibility; P, protective). The  $\beta$ -chain seems to be more important in which SS,SS,PS,PS genotypes were increased, but SS,SS,SP,SP genotypes usually have similar frequencies in diabetic and control subjects (10,12,18). This differentiation procedure reduces the number of healthy control subjects with risk genotypes to 16–18% but still identifies 69–70% of the patients (12,18). These figures are in fact close to those obtained by our single-locus typing procedure, where 14% of control subjects had high or moderate IDDM risk and where those two risk groups covered 62% of the patients studied.

The linkage disequilibrium between  $\alpha$ - and  $\beta$ -chain alleles, especially in a homogeneous population, is very

strong, and additional information obtained by typing for the  $\alpha$ -chain appears to be of limited significance. The most obvious example of valuable information is the distinction between DR3 and DR7 haplotypes with a similar DQB1\*0201  $\beta$ -chain but different  $\alpha$ -chains with either DQA1\*0501 (Arg52<sup>+</sup>) DQA1\*0201 (Arg52<sup>-</sup>). To some extent, this would increase the sensitivity of our assay, but at the cost of an additional PCR reaction, which is not a trivial cost in large screen-

ing programs. The genotypes with DQB1\*0201 alone without DQB1\*0302 were relatively scarce among our IDDM patients, and anyway, those with the DQB1\*0201/\*0302 genotype would belong to the moderate risk group if the DQB1\*0201 haplotype represented DQA1\*0201–DQB1\*0201 instead of DQA1\*0501–DQB1\*0201.

The proportion of DQB1\*0201/\*0302 heterozygotes (24.5%) was lower than expected from our previous study (5) and from several other studies in which the percentage has varied from 39 to 45% (16,18–20,22,23), but it is in accordance with the low number of DR3/DR4 heterozygotes reported earlier from the DiMe study (24) and is similar to the frequencies reported by Baisch et al. (14) and Gutierrez-Lopez et al. (17). These differences might reflect a sampling effect because the study population was recruited within a relatively short period of time, introducing bias from environmental accelerators and/or inhibitors of disease (e.g., infections) (25,26). Subjects

Table 6—The risk of IDDM in siblings according to the genotype of the proband

| DQB1* genotype proband | Sibling        | Progression to IDDM |
|------------------------|----------------|---------------------|
| High risk              | High risk      | 16/48 (33.3)*       |
|                        | Moderate risk  | 4/32 (12.5)         |
|                        | Low risk       | 1/36 (2.8)          |
|                        | Decreased risk | 0/42 (0)            |
|                        | Total          | 21/158 (13.3)†      |
| Moderate risk          | High risk      | 2/11 (18.2)         |
|                        | Moderate risk  | 17/99 (17.2)‡       |
|                        | Low risk       | 4/45 (8.9)          |
|                        | Decreased risk | 1/63 (1.6)          |
|                        | Total          | 24/218 (11.0)§      |
| Low risk               | High risk      | 1/7 (14.3)          |
|                        | Moderate risk  | 1/10 (10.0)         |
|                        | Low risk       | 5/80 (6.3)          |
|                        | Decreased risk | 0/60 (0)            |
|                        | Total          | 7/157 (4.9)         |
| Decreased risk         | High risk      | 1/2 (50.0)          |
|                        | Moderate risk  | 0/4 (0)             |
|                        | Low risk       | 1/6 (16.7)          |
|                        | Decreased risk | 2/61 (3.3)          |
|                        | Total          | 4/73 (5.5)          |
| Total                  | High risk      | 20/68 (29.4)        |
|                        | Moderate risk  | 22/145 (15.2)¶      |
|                        | Low risk       | 11/167 (6.6)#       |
|                        | Decreased risk | 3/226 (1.3)         |
|                        | Total          | 56/606 (9.2)        |

Data are n (%). \*P = 0.0001 vs. decreased risk; P = 0.0015 vs. low risk. †P = 0.011 vs. low risk total; P = 0.012 vs. decreased risk total. ‡P = 0.0048 vs. decreased risk. §P = 0.05 vs. low risk total. ||P = 0.0001 vs. decreased risk; P = 0.0001 vs. low risk; P = 0.043 vs. moderate risk. ¶P = 0.0001 vs. decreased risk; P = 0.023 vs. low risk. #P = 0.012 vs. decreased risk.

with different genotypes might differ in their susceptibility to disease-modifying agents like enteroviruses or mumps (27, 28). The higher proportion of DQB1\*0201/x genotype in boys, who are known to be more susceptible to complications associated with enterovirus infections (29), is in accord with this hypothesis as well as the tendency toward a seasonal pattern of new patients with this genotype. Lower numbers of IDDM diagnoses during summer months have also been detected in HLA-DR3-positive subjects in earlier studies (30–32). A recent virological study of the DiMe series emphasized the importance of enterovirus infections (33). However, these infections were found increased not only during the time period preceding clinical diagnosis but also years before, such that no clear-cut seasonal or yearly associations can be expected.

We confirmed our earlier finding of a higher proportion of children with high-risk genotype among those with IDDM who were diagnosed at an early age (32). The increased percentage of patients with DR3/4 genotype among children diagnosed at <5 years of age did not reach statistical significance ( $0.05 < P < 0.1$ ) in an earlier report based on the DiMe series (24). Thus, our present data demonstrate the superiority of the DQB1-based method in this respect also. The increased number of high-risk genotypes in younger-onset patients has also been detected in several other studies including young adults (34–36).

Our procedure using four sequence-specific oligonucleotide probes does not define only four alleles but combines others, such as DQB1\*0602 and DQB1\*0603. Both of these alleles are strongly protective, and a distinction would not be of added value. DQB1\*0304 is a recently described allele that in our typing scheme gives a positive reaction for both DQB1\*0301 and DQB1\*0302. Its frequency is low in whites of northern European descent (37). The few samples excluded from our study that show positivity for three alleles might still represent this allele.

Our observation of more severe metabolic decompensation at diagnosis in a small minority of children with the protective HLA-DQB1 genotypes may be explained by their increased frequency of acute infections at clinical presentation. However, whether this feature is related

to the DQB1 genotype remains an issue for future studies.

Genetic typing provides a means to identify susceptible individuals for studies of diabetes prediction and prevention, and it aids in the estimation of individual risk, especially when used in association with immunological risk markers. It is reasonable for a screening system to be most effective in predicting the onset of disease in the young so that this group can take advantage of preventive treatments as the results of risk-prediction studies rapidly accumulate. Our oligonucleotide choice is attractive in populations of northern European descent, but would be much less ideal in other populations, e.g., southern Europe (38). Thus, each screening protocol must be carefully tested for the population under study. The described procedure may also be used as the first step in the MHC typing of large series that focuses on specific gene combinations. Our increasing knowledge of MHC makes a "full-house" typing strategy a less and less practical strategy. The ultimate value of effective and affordable strategies for mass screening of diabetes risk markers will be determined by the development of effective disease prevention and intervention strategies.

**Acknowledgments**—The DiMe study was supported by grants from the National Institutes of Health (DK-37957), U.S.; the Sigrid Juselius Foundation; the Association of Finnish Life Insurance Companies; and the University of Helsinki. This part of the study was supported by grants from the Foundation for Pediatric Research (Ulla Hjelt Fund), Finland; the Foundation for Diabetes Research, Finland; and the Academy of Finland.

We thank the Finnish Red Cross Blood Transfusion Service and Dr. Saija Koskimies for help in collecting samples from the reference population. Prof. Hans-Michael Dosch is acknowledged for a critical review of the manuscript and Kaisa Anttila, Terttu Laurén, Markus Halminen, and Marja Suorsa, for their skillful technical assistance.

The Childhood Diabetes in Finland (DiMe) Study Group is composed of the following members: H.K. Åkerblom and J. Tuomilehto (Principal Investigators); R. Lounamaa, L. Toivanen and E.A. Kaprio (Coordinators); E. Virtala and J. Pitkaniemi (Data Managers); A. Fagerlund, M. Flittner, B. Gustafsson, C. Häggqvist, A. Hakulinen, L. Herva, P. Hiltunen, T. Huhtamäki, N.-P. Huttunen, T. Huupponen, M. Hyttinen, T. Joki, R. Jokisalo, M.-L. Käär, S. Kallio, E.A. Kaprio, U. Kaski, M. Knip, L.

Laine, J. Lappalainen, J. Mäenpää, A.-L. Mäkelä, K. Niemi, A. Niiranen, A. Nuuja, P. Ojajarvi, T. Otonkoski, K. Pihlajamäki, S. Pääntynen, J. Rajantie, J. Sankala, J. Schumacher, M. Sillanpää, M.-R. Ståhlberg, C.-H. Stråhlmann, T. Uotila, P. Varimo, G. Wetterstrand, and M. Väre (Local Investigators); A. Aro, M. Hiltunen, H. Hurme, H. Hyöty, J. Ilonen, J. Karjalainen, M. Knip, P. Leinikki, A. Miettinen, T. Petäys, H. Reijonen, L. Räsänen, A. Reunanen, T. Saukkonen, E. Savilahti, E. Tuomilehto-Wolf, S.M. Virtanen, and P. Vähäsalo (Special Investigators).

## References

1. Thorsby E, Rønningen KS: Particular HLA-DQ molecules play a dominant role in determining susceptibility or resistance to type-1 (insulin-dependent) diabetes mellitus. *Diabetologia* 36:371–377, 1993
2. Åkerblom HK, Dosch H-M, Robinson BH, Knip M, Karjalainen J, Savilahti E, Ilonen J, Virtanen SM, Reunanen A, Saukkonen T, Martin JM: Is dietary intervention for the prevention of insulin-dependent diabetes feasible? In *Prediabetes: Are We Ready to Intervene?* Laron Z, Karp M, Eds. Basel, Karger, 1993, p. 97–104
3. Bingley PJ, Bonifacio E, Gale EAM: Can we really predict IDDM? *Diabetes* 42:213–220, 1993
4. Pozzilli P: Ongoing trials reported to IDIG. *Diabetes Prevent Ther* 8:22–23, 1994
5. Reijonen H, Ilonen J, Knip M, Åkerblom HK: HLA-DQB1 alleles and absence of Asp-57 as susceptibility factors of IDDM in Finland. *Diabetes* 40:1640–1644, 1991
6. Sjöroos M, Iltia A, Ilonen J, Reijonen H, Lövgren T: Triple-label hybridization assay for type-1 diabetes-related HLA alleles. *Biotechniques* 18:870–877, 1995
7. Tuomilehto J, Lounamaa R, Tuomilehto-Wolf E, Reunanen A, Virtala E, Kaprio EA, Åkerblom HK, the Childhood Diabetes in Finland (DiMe) Study Group: Epidemiology of childhood diabetes mellitus in Finland: background of a nationwide study of Type 1 (insulin-dependent) diabetes mellitus. *Diabetologia* 35:70–76, 1992
8. Davies JL, Kawaguchi Y, Bennett ST, Copeman JB, Cordell HJ, Pritchard LE, Reed PW, Gough SCL, Jenkins SC, Palmer SM, Balfour KM, Rowe BR, Farrall M, Barnett AH, Bain SC, Todd JA: A genome-wide search for human type 1 diabetes susceptibility genes. *Nature* 371:130–136, 1994
9. Todd JA, Bell JI, McDevitt HO: HLA-DQB gene contributes to susceptibility and resistance to insulin-dependent diabetes mellitus. *Nature* 329:599–604, 1987
10. Khalil I, D'Auriol L, Gobet M, Morin I, Lepage V, Deschamps I, Park MS, Degos L, Galibert H, Hors J: A combination of HLA-DQB Asp57-negative and HLA-DQA Arg52 con-

- fers susceptibility to insulin-dependent diabetes mellitus. *J Clin Invest* 85:1315-1319, 1990
11. Lipton RB, Kocova M, LaPorte RE, Dorman JS, Orchard TJ, Riley WJ, Drash AL, Becker DJ, Trucco M: Autoimmunity and genetics contribute to the risk of insulin-dependent diabetes-mellitus in families: islet cell antibodies and HLA DQ heterodimers. *Am J Epidemiol* 136:503-512, 1992
12. Ronningen KS, Spurkland A, Tait BD, Drummond B, Lopez-Larrea C, Baranda FS, Menendez-Diaz MJ, Caillat-Zucman S, Beaurain G, Garchon H-J, Ilonen J, Reijonen H, Knip M, Boehm BO, Rosak C, Löliger C, Kühnl P, Ottenhoff T, Contu L, Carcassi C, Savi M, Zanelli P, Neri TM, Hamaguchi K, Kimura A, Dong RP, Chikuba N, Nagataki S, Gorodezky C, Debaz H, Robles C, Coimbra HB, Martinho A, Ruas MA, Sachs JA, Garcia-Pacheco M, Biro A, Nikaein A, Dombrasusky L, Gonwa T, Zmijewski C, Monos D, Kamoun M, Layrisse Z, Magli MC, Balducci P, Thorsby E: HLA class II associations in insulin-dependent diabetes mellitus among blacks, Caucasoids, and Japanese. In *HLA 1991*. Tsuji K, Aizawa M, Sasazuki T, Eds. Oxford, Oxford University Press, 1992, p. 713-722
13. Ronningen KS, Iwe T, Halstensen TS, Spurkland A, Thorsby E: The amino acid at position 57 of the HLA-DQ $\beta$  chain and susceptibility to develop insulin-dependent diabetes mellitus. *Hum Immunol* 26: 215-225, 1989
14. Baisch JM, Weeks T, Giles R, Hoover M, Stastny P, Capra JD: Analysis of HLA-DQ genotypes and susceptibility in insulin-dependent diabetes mellitus. *N Engl J Med* 322:1836-1841, 1990
15. Dorman JS, LaPorte RE, Stone R, Trucco M: Worldwide differences in the incidence of type 1 diabetes are associated with amino acid variation at position 57 of the HLA-DQ $\beta$  chain. *Proc Natl Acad Sci USA* 87: 7370-7374, 1990
16. Vallet-Colom I, Lévy-Marchal C, Zarrouk D, Tichet J, Krishnamoorthy R, Czernichow P, Elion J: HLA-DQB1 codon 57 and genetic susceptibility to type 1 (insulin-dependent) diabetes mellitus in French children. *Diabetologia* 33:174-176, 1990
17. Gutierrez-Lopez MD, Bertera S, Chantres MT, Vavassori C, Dorman JS, Trucco M, Serrano-Rios M: Susceptibility to type-1 (insulin-dependent) diabetes-mellitus in Spanish patients correlates quantitatively with expression of HLA-DQ $\alpha$  Arg 52 and HLA-DQ $\beta$  Non-Asp 57 alleles. *Diabetologia* 35:583-588, 1992
18. Heimberg H, Nagy ZP, Somers G, Leeuw ID, Schuit FC: Complementation of HLA-DQA and -DQB genes confers susceptibility and protection to insulin-dependent diabetes mellitus. *Hum Immunol* 33:10-17, 1992
19. Forbes LV, Brown LJ, Scott RS: HLA-DQ-beta typing and non-Asp57 alleles in IDDM and nondiabetic subjects in New Zealand. *Diabetes Care* 16:1179-1183, 1993
20. Baranda FS, Coto E, Diaz JM, Martinez-Naves E, Martinez VA, Lopez-Larrea C: HLA class II and susceptibility and resistance to insulin-dependent diabetes mellitus in a population from the northwest of Spain. *Eur J Immunogen* 21:219-229, 1994
21. Tosi G, Pinelli L, Facchin A, Accolla RS: Assessment of the DQB1-DQA1 complete genotype allows best prediction for IDDM. *Diabetes Care* 17:1045-1049, 1994
22. Ronningen KS, Spurkland A, Iwe T, Vartdal F, Thorsby E: Distribution of HLA-DRB1, HLA-DQA1 and HLA-DQB1 alleles and DQA1-DQB1 genotypes among Norwegian patients with insulin-dependent diabetes mellitus. *Tissue Antigens* 37: 105-111, 1991
23. Khalil I, Deschamps I, Lepage V, Al-Daccak R, Degos L, Hors J: Dose effect of cis- and trans-encoded HLA-DQ $\alpha\beta$  heterodimers in IDDM susceptibility. *Diabetes* 41:378-384, 1992
24. Tuomilehto-Wolf E, Tuomilehto J, the DiMe Study Group: Is the high incidence of diabetes in young children diagnosed under the age of 4 years determined by genetic factors in Finland. *Diabete Metab* 19:167-172, 1993
25. Kontiainen S, Scheinin T, Schlenzka A, Mäenpää J, Groop L, Koskimies S: Differences in HLA types in children with insulin-dependent diabetes diagnosed in 1960s, 1970s, and 1980s. *Lancet* ii:219, 1988
26. Mäenpää A, Koskimies S, Scheinin T, Schlenzka A, Åkerblom HK, Mäenpää J, Reunanen A, Kontiainen S: Frequencies of HLA-DR3, -DR4, -B8 and -Bw62 in diabetic children diagnosed between 1960 and 1990. *Diabetes Res* 16:159-163, 1991
27. Fohlman J, Böhme J, Rask L, Frisk G, Diderholm H, Friman G, Tuvemo T: Matching of host genotype and serotypes of coxsackie B virus in the development of juvenile diabetes. *Scand J Immunol* 26: 105-110, 1987
28. Hyöty H, Leinikki P, Reunanen A, Ilonen J, Surcel H-M, Rivila A, Åkerblom HK: Mumps infections in the etiology of type 1 (insulin-dependent) diabetes. *Diabetes Res* 9:111-116, 1988
29. Moore M, Morens DM: Enteroviruses, including polioviruses. In *Textbook of Human Virology*. Belshe RB, Ed. Littleton, MA, TPSG Publishing Co, 1984, p. 407-483.
30. Ludvigsson J, Samuelsson U, Beauforts C, Deschamps I, Dorchy H, Drash A, Francois R, Herz G, New M, Schober E: HLA-DR3 is associated with a more slowly progressive form of Type 1 (insulin-dependent) diabetes. *Diabetologia* 29:207-210, 1986
31. Weinberg CR, Dornan TL, Hansen JA, Raghu PK, Palmer JP: HLA-related heterogeneity in seasonal patterns of diagnosis in type-1 (insulin-dependent) diabetes. *Diabetologia* 26:199-202, 1984
32. Mustonen A, Ilonen J, Tiilikainen A, Kataja M, Åkerblom HK: An analysis of epidemiological data in HLA-typed diabetic children. *Diabetologia* 28:397-400, 1985
33. Hyöty H, Hiltunen M, Knip M, Laakkonen M, Vähäsalo P, Karjalainen J, Koskela P, Roivainen M, Leinikki P, Hovi T, Åkerblom HK, the Childhood Diabetes in Finland (DiMe) Study Group: A prospective study of the role of Coxsackie B and other enterovirus infections in the pathogenesis of IDDM. *Diabetes* 44:652-657, 1995
34. Karjalainen J, Salmela P, Ilonen J, Surcel H-M, Knip M: A comparison of childhood and adult type 1 diabetes mellitus. *N Engl J Med* 320:881-886, 1989
35. Caillat-Zucman S, Garchon HJ, Timsit J, Assan R, Boitard C, Djilalisaiiah I, Bougnères P, Bach JF: Age-dependent HLA genetic heterogeneity of type-1 insulin-dependent diabetes mellitus. *J Clin Invest* 90:2242-2250, 1992
36. Vandewalle CL, Decraene T, Schuit FC, DeLeeuw IH, Pipeleers DG, Gorus FK, the Belgian Diabetes Registry: Insulin autoantibodies and high titre islet cell antibodies are preferentially associated with the HLA DQA1\*0301-DQB1\*0302 haplotype at clinical onset of type-1 (insulin-dependent) diabetes-mellitus before age 10 years, but not at onset between age 10 and 40 years. *Diabetologia* 36:1155-1162, 1993
37. Cerna M, Fernandez-Vina M, Ivaskova E, Stastny P: Comparison of HLA class II alleles in Gypsy and Czech populations by DNA typing with oligonucleotide probes. *Tissue Antigens* 39:111-116, 1992
38. Cambon-Thomsen A: HLA population genetics. In *Epidemiology and Etiology of Insulin-Dependent Diabetes Mellitus in the Young*. Levy-Marchal C, Czernichow P, Eds. Basel, Karger, 1992, p. 130-157
